# Supplementary material
Source: ML conference proceedings conference paper supplement (https://proceedings.neurips.cc/paper_files/paper/2016/hash/7f53f8c6c730af6aeb52e66eb74d8507-Abstract.html)
Supplement: Supplementary file [file 7f53f8c6c730af6aeb52e66eb74d8507-Supplemental.zip]

## Appendix for Learning Bound for Parameter Transfer Learning

### A Appendix: Lemma for Proof of Theorem 1

In this subsection, we omit the subscript  $\mathcal{T}$  for simplicity. In addition, we denote  $\theta_S^*$  by  $\theta^*$  simply. We recall

$$\begin{aligned}\widehat{\mathbf{w}}_{N,n} &:= \operatorname{argmin}_{\mathbf{w} \in \mathcal{W}_{\mathcal{T}}} \frac{1}{n} \sum_{j=1}^n \ell(y_j, \langle \mathbf{w}, \psi_{\widehat{\boldsymbol{\theta}}_N}(\mathbf{x}) \rangle) + \rho r(\mathbf{w}), \\ \widehat{\mathbf{w}}_n^* &:= \operatorname{argmin}_{\mathbf{w} \in \mathcal{W}} \frac{1}{n} \sum_{j=1}^n \ell(y_j, \langle \mathbf{w}, \psi_{\boldsymbol{\theta}^*}(\mathbf{x}_j) \rangle) + \rho r(\mathbf{w}).\end{aligned}$$

The inequality (4) is obtained by the following lemma.

**Lemma 1.** *The following holds with probability  $1 - \bar{\delta}$ :*

$$\|\widehat{\mathbf{w}}_{N,n} - \widehat{\mathbf{w}}_n^*\|_2 \leq \sqrt{\frac{2R_{\mathcal{W}}L_{\ell}L_{\psi}}{\rho}} \|\widehat{\boldsymbol{\theta}}_N - \boldsymbol{\theta}^*\|. \quad (15)$$

**[Proof]** Let us define as

$$\begin{aligned}\widehat{f}_{N,n}(\mathbf{w}) &:= \frac{1}{n} \sum_{j=1}^n \ell(y_j, \langle \mathbf{w}, \psi_{\widehat{\boldsymbol{\theta}}_N}(\mathbf{x}) \rangle) + \rho r(\mathbf{w}), \\ \widehat{f}_n^*(\mathbf{w}) &:= \frac{1}{n} \sum_{j=1}^n \ell(y_j, \langle \mathbf{w}, \psi_{\boldsymbol{\theta}^*}(\mathbf{x}_j) \rangle) + \rho r(\mathbf{w}).\end{aligned}$$

If

$$\widehat{f}_n^*(\widehat{\mathbf{w}}_n^*) \leq \widehat{f}_{N,n}(\widehat{\mathbf{w}}_{N,n}),$$

we have the following with probability  $1 - \bar{\delta}$ :

$$\begin{aligned}\widehat{f}_{N,n}(\widehat{\mathbf{w}}_n^*) - \widehat{f}_{N,n}(\widehat{\mathbf{w}}_{N,n}) &\leq \widehat{f}_{N,n}(\widehat{\mathbf{w}}_n^*) - \widehat{f}_n^*(\widehat{\mathbf{w}}_n^*) + \widehat{f}_n^*(\widehat{\mathbf{w}}_n^*) - \widehat{f}_{N,n}(\widehat{\mathbf{w}}_{N,n}) \\ &\leq \widehat{f}_{N,n}(\widehat{\mathbf{w}}_n^*) - \widehat{f}_n^*(\widehat{\mathbf{w}}_n^*) \\ &= \frac{1}{n} \sum_{j=1}^n \ell(y_j, \langle \widehat{\mathbf{w}}_n^*, \psi_{\widehat{\boldsymbol{\theta}}_N}(\mathbf{x}_j) \rangle) - \frac{1}{n} \sum_{j=1}^n \ell(y_j, \langle \widehat{\mathbf{w}}_n^*, \psi_{\boldsymbol{\theta}^*}(\mathbf{x}_j) \rangle) \\ &\leq \frac{1}{n} \sum_{j=1}^n L_{\ell} \left| \langle \widehat{\mathbf{w}}_n^*, \psi_{\widehat{\boldsymbol{\theta}}_N}(\mathbf{x}_j) \rangle - \langle \widehat{\mathbf{w}}_n^*, \psi_{\boldsymbol{\theta}^*}(\mathbf{x}_j) \rangle \right| \\ &\leq \frac{1}{n} \sum_{j=1}^n L_{\ell} R_{\mathcal{W}} \left\| \psi_{\widehat{\boldsymbol{\theta}}_N}(\mathbf{x}_j) - \psi_{\boldsymbol{\theta}^*}(\mathbf{x}_j) \right\| \\ &\leq \frac{1}{n} \sum_{j=1}^n L_{\ell} R_{\mathcal{W}} L_{\psi} \left\| \widehat{\boldsymbol{\theta}}_N - \boldsymbol{\theta}^* \right\| \\ &= L_{\ell} R_{\mathcal{W}} L_{\psi} \left\| \widehat{\boldsymbol{\theta}}_N - \boldsymbol{\theta}^* \right\|.\end{aligned}$$

Since  $\widehat{f}_{N,n}$  is  $\rho$ -strongly convex and  $\widehat{\mathbf{w}}_{N,n}$  is its miniizer,

$$\widehat{f}_{N,n}(\widehat{\mathbf{w}}_n^*) - \widehat{f}_{N,n}(\widehat{\mathbf{w}}_{N,n}) \geq \frac{\rho}{2} \|\widehat{\mathbf{w}}_n^* - \widehat{\mathbf{w}}_{N,n}\|_2^2.$$

Thus, we obtain (15).

Similarly, if

$$\widehat{f}_n^*(\widehat{\mathbf{w}}_n^*) \geq \widehat{f}_{N,n}(\widehat{\mathbf{w}}_{N,n}),$$

we have the following with probability  $1 - \bar{\delta}$ :

$$\begin{aligned}
\hat{f}_n^*(\hat{\mathbf{w}}_{N,n}) - \hat{f}_n^*(\hat{\mathbf{w}}_n^*) &\leq \hat{f}_n^*(\hat{\mathbf{w}}_{N,n}) - \hat{f}_{N,n}(\hat{\mathbf{w}}_{N,n}) + \hat{f}_{N,n}(\hat{\mathbf{w}}_{N,n}) - \hat{f}_n^*(\hat{\mathbf{w}}_n^*) \\
&\leq \hat{f}_n^*(\hat{\mathbf{w}}_{N,n}) - \hat{f}_{N,n}(\hat{\mathbf{w}}_{N,n}) \\
&= \frac{1}{n} \sum_{j=1}^n \ell(y_j, \langle \hat{\mathbf{w}}_{N,n}, \psi_{\theta^*}(\mathbf{x}_j) \rangle) - \frac{1}{n} \sum_{j=1}^n \ell(y_j, \langle \hat{\mathbf{w}}_{N,n}, \psi_{\hat{\theta}_N}(\mathbf{x}_j) \rangle) \\
&\leq \frac{1}{n} \sum_{j=1}^n L_\ell \left| \langle \hat{\mathbf{w}}_{N,n}, \psi_{\theta^*}(\mathbf{x}_j) \rangle - \langle \hat{\mathbf{w}}_{N,n}, \psi_{\hat{\theta}_N}(\mathbf{x}_j) \rangle \right| \\
&\leq \frac{1}{n} \sum_{j=1}^n L_\ell R_{\mathcal{W}} \left\| \psi_{\theta^*}(\mathbf{x}_j) - \psi_{\hat{\theta}_N}(\mathbf{x}_j) \right\| \\
&\leq \frac{1}{n} \sum_{j=1}^n L_\ell R_{\mathcal{W}} L_\psi \left\| \hat{\theta}_N - \theta^* \right\| \\
&= L_\ell R_{\mathcal{W}} L_\psi \left\| \hat{\theta}_N - \theta^* \right\|.
\end{aligned}$$

Since  $\hat{f}_n^*$  is  $\rho$ -strongly convex and  $\hat{\mathbf{w}}_n^*$  is its minimizer,

$$\hat{f}_n^*(\hat{\mathbf{w}}_{N,n}) - \hat{f}_n^*(\hat{\mathbf{w}}_n^*) \geq \frac{\rho}{2} \|\hat{\mathbf{w}}_{N,n} - \hat{\mathbf{w}}_n^*\|_2^2.$$

Thus, we obtain (15). ■

## B Appendix: Proof of Sparse Coding Stability

The proof of Theorem 2 is almost the same as that of Theorem 1 in Mehta and Gray (2012). However, since a part of the proof can not applied to our setting, we provide the full proof of Theorem 2 in this section.

**Lemma 2.** Let  $\mathbf{a} \in \mathbb{R}^m$  and  $\mathbf{E} \in \mathbb{R}^{d \times m}$ . Then,  $\|\mathbf{E}\mathbf{a}\|_2 \leq \|\mathbf{E}\|_{1,2} \|\mathbf{a}\|_1$ .

[Proof]

$$\|\mathbf{E}\mathbf{a}\|_2 = \left\| \sum_{i=1}^m a_i \mathbf{e}_i \right\|_2 \leq \sum_{i=1}^m |a_i| \|\mathbf{e}_i\|_2 \leq \|\mathbf{E}\|_{1,2} \sum_{i=1}^m |a_i| = \|\mathbf{E}\|_{1,2} \|\mathbf{a}\|_1.$$
■

**Lemma 3.** The sparse representation  $\varphi_{\mathbf{D}}(\mathbf{x})$  satisfies  $\|\varphi_{\mathbf{D}}(\mathbf{x})\|_1 \leq \frac{\|\mathbf{x}\|_2^2}{2\lambda}$ .

[Proof]

$$\begin{aligned}
\lambda \|\varphi_{\mathbf{D}}(\mathbf{x})\|_1 &\leq \frac{1}{2} \|\mathbf{x} - \mathbf{D}\varphi_{\mathbf{D}}(\mathbf{x})\|_2^2 + \lambda \|\varphi_{\mathbf{D}}(\mathbf{x})\|_1 \\
&= \min_{z \in \mathbb{R}^m} \frac{1}{2} \|\mathbf{x} - \mathbf{D}z\|_2^2 + \lambda \|z\|_1 \\
&\leq \frac{1}{2} \|\mathbf{x}\|_2^2.
\end{aligned}$$
■

We prepare the following notation:

$$v_{\mathbf{D}}(\mathbf{z}) := \frac{1}{2} \|\mathbf{x} - \mathbf{D}\mathbf{z}\|_2^2 + \lambda \|\mathbf{z}\|_1.$$

Let  $\mathbf{a}^*$  and  $\tilde{\mathbf{a}}^*$  respectively denote the solutions to the LASSO problems for the dictionary  $\mathbf{D}$  and  $\tilde{\mathbf{D}}$ :

$$\mathbf{a}^* := \operatorname{argmin}_{\mathbf{z} \in \mathbb{R}^m} v_{\mathbf{D}}(\mathbf{z}), \quad \tilde{\mathbf{a}}^* := \operatorname{argmin}_{\mathbf{z} \in \mathbb{R}^m} v_{\tilde{\mathbf{D}}}(\mathbf{z})$$

Then, the following equation holds due to the subgradient of  $v_{\mathbf{D}}(\mathbf{z})$  with respect to  $\mathbf{z}$  (e.g. (2.8) of ?).

**Lemma 4.**

$$\lambda \|\mathbf{a}^*\|_1 = \langle \mathbf{x} - \mathbf{D}\mathbf{a}^*, \mathbf{D}\mathbf{a}^* \rangle.$$

Let  $v_{\mathbf{D}}$  and  $v_{\tilde{\mathbf{D}}}$  be the optimal values of the LASSO problems for the dictionary  $\mathbf{D}$  and  $\tilde{\mathbf{D}}$ :

$$\begin{aligned} v_{\mathbf{D}} &:= \min_{\mathbf{z} \in \mathbb{R}^m} v_{\mathbf{D}}(\mathbf{z}) = \frac{1}{2} \|\mathbf{x} - \mathbf{D}\mathbf{a}^*\|_2^2 + \lambda \|\mathbf{a}^*\|_1, \\ v_{\tilde{\mathbf{D}}} &:= \min_{\mathbf{z} \in \mathbb{R}^m} v_{\tilde{\mathbf{D}}}(\mathbf{z}) = \frac{1}{2} \|\mathbf{x} - \tilde{\mathbf{D}}\tilde{\mathbf{a}}^*\|_2^2 + \lambda \|\tilde{\mathbf{a}}^*\|_1. \end{aligned}$$

**Lemma 5** (Optimal Value Stability). *If  $\|\mathbf{D} - \tilde{\mathbf{D}}\|_{1,2} \leq \lambda$ , then*

$$|v_{\mathbf{D}} - v_{\tilde{\mathbf{D}}}| \leq \frac{1}{2} \left( 1 + \frac{\|\mathbf{x}\|_2}{4} \right) \|\mathbf{x}\|_2^3 \frac{\|\mathbf{D} - \tilde{\mathbf{D}}\|_{1,2}}{\lambda}.$$

**[Proof]**

$$\begin{aligned} v_{\tilde{\mathbf{D}}} &\leq \frac{1}{2} \|\mathbf{x} - \tilde{\mathbf{D}}\mathbf{a}^*\|_2^2 + \lambda \|\mathbf{a}^*\|_1 \\ &= \frac{1}{2} \|\mathbf{x} - \mathbf{D}\mathbf{a}^* + (\mathbf{D} - \tilde{\mathbf{D}})\mathbf{a}^*\|_2^2 + \lambda \|\mathbf{a}^*\|_1 \\ &\leq \frac{1}{2} (\|\mathbf{x} - \mathbf{D}\mathbf{a}^*\|_2^2 + 2\|\mathbf{x} - \mathbf{D}\mathbf{a}^*\|_2 \|(\mathbf{D} - \tilde{\mathbf{D}})\mathbf{a}^*\|_2 + \|(\mathbf{D} - \tilde{\mathbf{D}})\mathbf{a}^*\|_2^2) + \lambda \|\mathbf{a}^*\|_1 \\ &\leq \frac{1}{2} \|\mathbf{x} - \mathbf{D}\mathbf{a}^*\|_2^2 + \lambda \|\mathbf{a}^*\|_1 + \|\mathbf{x}\|_2 \left( \frac{\|\mathbf{x}\|_2^2 \|\mathbf{D} - \tilde{\mathbf{D}}\|_{1,2}}{2\lambda} \right) + \frac{1}{2} \left( \frac{\|\mathbf{x}\|_2^2 \|\mathbf{D} - \tilde{\mathbf{D}}\|_{1,2}}{2\lambda} \right)^2 \\ &\leq v_{\mathbf{D}} + \left( 1 + \frac{\|\mathbf{x}\|_2}{4} \right) \frac{\|\mathbf{x}\|_2^3}{2\lambda} \|\mathbf{D} - \tilde{\mathbf{D}}\|_{1,2}, \end{aligned}$$

where we used

$$\|\mathbf{x} - \mathbf{D}\mathbf{a}^*\|_2 = \sqrt{\|\mathbf{x} - \mathbf{D}\mathbf{a}^*\|^2} \leq \sqrt{\|\mathbf{x} - \mathbf{D}\mathbf{a}^*\|^2 + \lambda \|\mathbf{a}^*\|_1} \leq \sqrt{\|\mathbf{x}\|_2^2} = \|\mathbf{x}\|_2.$$

■

The following lemma 6 is obtained by the proof of Lemma 11 in [Mehta and Gray \(2012\)](#).

**Lemma 6** (Stability of Norm of Reconstructor). *If  $\|\mathbf{D} - \tilde{\mathbf{D}}\|_{1,2} \leq \lambda$ , then*

$$\left| \|\mathbf{D}\mathbf{a}^*\|_2^2 - \|\tilde{\mathbf{D}}\tilde{\mathbf{a}}^*\|_2^2 \right| \leq 2|v_{\mathbf{D}} - v_{\tilde{\mathbf{D}}}| = \left( 1 + \frac{\|\mathbf{x}\|_2}{4} \right) \|\mathbf{x}\|_2^3 \frac{\|\mathbf{D} - \tilde{\mathbf{D}}\|_{1,2}}{\lambda}.$$

**Lemma 7.** *If  $\|\mathbf{D} - \tilde{\mathbf{D}}\|_{1,2} \leq \lambda$ , then*

$$\left| \|\mathbf{D}\mathbf{a}^*\|_2^2 - \|\tilde{\mathbf{D}}\tilde{\mathbf{a}}^*\|_2^2 \right| \leq (\|\mathbf{x}\|_2 + 3) \|\mathbf{x}\|_2^3 \frac{\|\mathbf{D} - \tilde{\mathbf{D}}\|_{1,2}}{\lambda}.$$

**[Proof]** First, note that

$$\|(\tilde{\mathbf{D}} - \mathbf{D})\tilde{\mathbf{a}}^*\|_2 \leq \|(\tilde{\mathbf{D}} - \mathbf{D})\|_{1,2} \|\tilde{\mathbf{a}}^*\|_1 \leq \|\mathbf{x}\|_2^2 \frac{\|\mathbf{D} - \tilde{\mathbf{D}}\|_{1,2}}{2\lambda}$$

and

$$\begin{aligned} \|\tilde{\mathbf{D}}\tilde{\mathbf{a}}^*\|_2 &\leq \|(\mathbf{D} - \tilde{\mathbf{D}})\tilde{\mathbf{a}}^*\|_2 + \|\tilde{\mathbf{D}}\tilde{\mathbf{a}}^* - \mathbf{x}\|_2 + \|\mathbf{x}\|_2 \\ &\leq \|\mathbf{x}\|_2^2 \frac{\|\mathbf{D} - \tilde{\mathbf{D}}\|_{1,2}}{2\lambda} + 2\|\mathbf{x}\|_2 \\ &\leq \left( \frac{1}{2} \|\mathbf{x}\|_2 + 2 \right) \|\mathbf{x}\|_2, \end{aligned}$$

where we used Lemma 3. Then, we have

$$\begin{aligned}
& \left| \|\mathbf{D}\tilde{\mathbf{a}}^*\|_2^2 - \|\tilde{\mathbf{D}}\tilde{\mathbf{a}}^*\|_2^2 \right| \\
& \leq 2 \left| \langle \mathbf{D}\tilde{\mathbf{a}}^*, (\tilde{\mathbf{D}} - \mathbf{D})\tilde{\mathbf{a}}^* \rangle \right| + \|(\tilde{\mathbf{D}} - \mathbf{D})\tilde{\mathbf{a}}^*\|_2^2 \\
& \leq 2\|\mathbf{D}\tilde{\mathbf{a}}^*\|_2 \|(\tilde{\mathbf{D}} - \mathbf{D})\tilde{\mathbf{a}}^*\|_2 + \|(\tilde{\mathbf{D}} - \mathbf{D})\tilde{\mathbf{a}}^*\|_2^2 \\
& \leq 2 \left( \frac{1}{2}\|\mathbf{x}\|_2 + 2 \right) \|\mathbf{x}\|_2 \left( \frac{\|\mathbf{x}\|_2^2 \|\mathbf{D} - \tilde{\mathbf{D}}\|_{1,2}}{2\lambda} \right) + \left( \frac{\|\mathbf{x}\|_2^2 \|\mathbf{D} - \tilde{\mathbf{D}}\|_{1,2}}{2\lambda} \right)^2 \\
& \leq \left( \frac{3}{4}\|\mathbf{x}\|_2 + 2 \right) \|\mathbf{x}\|_2^3 \frac{\|\mathbf{D} - \tilde{\mathbf{D}}\|_{1,2}}{\lambda}.
\end{aligned}$$

Combining this fact with Lemma 6, we have

$$\begin{aligned}
& \left| \|\mathbf{D}\mathbf{a}^*\|_2^2 - \|\mathbf{D}\tilde{\mathbf{a}}^*\|_2^2 \right| \\
& \leq \left| \|\mathbf{D}\mathbf{a}^*\|_2^2 - \|\tilde{\mathbf{D}}\tilde{\mathbf{a}}^*\|_2^2 \right| + \left| \|\tilde{\mathbf{D}}\tilde{\mathbf{a}}^*\|_2^2 - \|\mathbf{D}\tilde{\mathbf{a}}^*\|_2^2 \right| \\
& \leq \left( 1 + \frac{\|\mathbf{x}\|_2}{4} \right) \|\mathbf{x}\|_2^3 \frac{\|\mathbf{D} - \tilde{\mathbf{D}}\|_{1,2}}{\lambda} + \left( \frac{3}{4}\|\mathbf{x}\|_2 + 2 \right) \|\mathbf{x}\|_2^3 \frac{\|\mathbf{D} - \tilde{\mathbf{D}}\|_{1,2}}{\lambda} \\
& = (\|\mathbf{x}\|_2 + 3) \|\mathbf{x}\|_2^3 \frac{\|\mathbf{D} - \tilde{\mathbf{D}}\|_{1,2}}{\lambda}.
\end{aligned}$$

■

**Lemma 8** (Reconstructor Stability). *If  $\|\mathbf{D} - \tilde{\mathbf{D}}\|_{1,2} \leq \lambda$ , then*

$$\|\mathbf{D}\mathbf{a}^* - \mathbf{D}\tilde{\mathbf{a}}^*\|_2^2 \leq 2 \left( 3\|\mathbf{x}\|_2^2 + 9\|\mathbf{x}\|_2 + 2 \right) \|\mathbf{x}\|_2^2 \frac{\|\mathbf{D} - \tilde{\mathbf{D}}\|_{1,2}}{\lambda}.$$

**[Proof]** We set as  $\bar{\mathbf{a}}^* := \frac{1}{2}(\mathbf{a}^* + \tilde{\mathbf{a}}^*)$ . From the optimality of  $\mathbf{a}^*$ , it follows that  $v_{\mathbf{D}}(\mathbf{a}^*) \leq v_{\mathbf{D}}(\bar{\mathbf{a}}^*)$ , that is,

$$\frac{1}{2}\|\mathbf{x} - \mathbf{D}\mathbf{a}^*\|_2^2 + \lambda\|\mathbf{a}^*\|_1 \leq \frac{1}{2}\|\mathbf{x} - \mathbf{D}\bar{\mathbf{a}}^*\|_2^2 + \lambda\|\bar{\mathbf{a}}^*\|_1. \quad (16)$$

We denote as  $\epsilon := \|\mathbf{D} - \tilde{\mathbf{D}}\|_{1,2}$ ,  $c_{\mathbf{x}} := \left( 1 + \frac{\|\mathbf{x}\|_2}{4} \right) \|\mathbf{x}\|_2^3$  and  $c'_{\mathbf{x}} := (\|\mathbf{x}\|_2 + 3) \|\mathbf{x}\|_2^3$ .

By the convexity of the  $l_1$ -norm, the RHS of (16) obeys:

$$\begin{aligned}
& \frac{1}{2} \left\| \mathbf{x} - \mathbf{D} \left( \frac{\mathbf{a}^* + \tilde{\mathbf{a}}^*}{2} \right) \right\|_2^2 + \lambda \left\| \frac{\mathbf{a}^* + \tilde{\mathbf{a}}^*}{2} \right\|_1 \\
& \leq \frac{1}{2} \left\| \mathbf{x} - \frac{1}{2}(\mathbf{D}\mathbf{a}^* + \mathbf{D}\tilde{\mathbf{a}}^*) \right\|_2^2 + \frac{\lambda}{2} \|\mathbf{a}^*\|_1 + \frac{\lambda}{2} \|\tilde{\mathbf{a}}^*\|_1 \\
& = \frac{1}{2} \left( \|\mathbf{x}\|_2^2 - 2 \left\langle \mathbf{x}, \frac{1}{2}(\mathbf{D}\mathbf{a}^* + \mathbf{D}\tilde{\mathbf{a}}^*) \right\rangle + \frac{1}{4} \|\mathbf{D}\mathbf{a}^* + \mathbf{D}\tilde{\mathbf{a}}^*\|_2^2 \right) + \frac{\lambda}{2} \|\mathbf{a}^*\|_1 + \frac{\lambda}{2} \|\tilde{\mathbf{a}}^*\|_1 \\
& = \frac{1}{2} \|\mathbf{x}\|_2^2 - \frac{1}{2} \langle \mathbf{x}, \mathbf{D}\mathbf{a}^* \rangle - \frac{1}{2} \langle \mathbf{x}, \mathbf{D}\tilde{\mathbf{a}}^* \rangle + \frac{1}{8} (\|\mathbf{D}\mathbf{a}^*\|_2^2 + \|\mathbf{D}\tilde{\mathbf{a}}^*\|_2^2 + 2\langle \mathbf{D}\mathbf{a}^*, \mathbf{D}\tilde{\mathbf{a}}^* \rangle) \\
& \quad + \frac{\lambda}{2} \|\mathbf{a}^*\|_1 + \frac{\lambda}{2} \|\tilde{\mathbf{a}}^*\|_1 \\
& \leq \frac{1}{2} \|\mathbf{x}\|_2^2 - \frac{1}{2} \langle \mathbf{x}, \mathbf{D}\mathbf{a}^* \rangle - \frac{1}{2} \langle \mathbf{x}, \mathbf{D}\tilde{\mathbf{a}}^* \rangle + \frac{1}{4} \|\mathbf{D}\mathbf{a}^*\|_2^2 + \frac{1}{4} \langle \mathbf{D}\mathbf{a}^*, \mathbf{D}\tilde{\mathbf{a}}^* \rangle \\
& \quad + \frac{\lambda}{2} \|\mathbf{a}^*\|_1 + \frac{\lambda}{2} \|\tilde{\mathbf{a}}^*\|_1 + \frac{c'_x}{8} \frac{\epsilon}{\lambda} \\
& = \frac{1}{2} \|\mathbf{x}\|_2^2 - \frac{1}{2} \langle \mathbf{x}, \mathbf{D}\mathbf{a}^* \rangle - \frac{1}{2} \langle \mathbf{x}, \mathbf{D}\tilde{\mathbf{a}}^* \rangle + \frac{1}{4} \|\mathbf{D}\mathbf{a}^*\|_2^2 + \frac{1}{4} \langle \mathbf{D}\mathbf{a}^*, \mathbf{D}\tilde{\mathbf{a}}^* \rangle \\
& \quad + \frac{1}{2} \langle \mathbf{x} - \mathbf{D}\mathbf{a}^*, \mathbf{D}\mathbf{a}^* \rangle + \frac{1}{2} \langle \mathbf{x} - \tilde{\mathbf{D}}\tilde{\mathbf{a}}^*, \tilde{\mathbf{D}}\tilde{\mathbf{a}}^* \rangle + \frac{c'_x}{8} \frac{\epsilon}{\lambda} \tag{17} \\
& \leq \frac{1}{2} \|\mathbf{x}\|_2^2 - \frac{1}{2} \langle \mathbf{x}, \mathbf{D}\mathbf{a}^* \rangle - \frac{1}{2} \langle \mathbf{x}, \mathbf{D}\tilde{\mathbf{a}}^* \rangle + \frac{1}{4} \|\mathbf{D}\mathbf{a}^*\|_2^2 + \frac{1}{4} \langle \mathbf{D}\mathbf{a}^*, \mathbf{D}\tilde{\mathbf{a}}^* \rangle \\
& \quad + \frac{1}{2} \langle \mathbf{x}, \mathbf{D}\mathbf{a}^* \rangle - \frac{1}{2} \|\mathbf{D}\mathbf{a}^*\|_2^2 + \frac{1}{2} \langle \mathbf{x}, \tilde{\mathbf{D}}\tilde{\mathbf{a}}^* \rangle - \frac{1}{2} \|\mathbf{D}\mathbf{a}^*\|_2^2 + \left( \frac{c'_x}{8} + \frac{c_x}{4} \right) \frac{\epsilon}{\lambda} \\
& = \frac{1}{2} \|\mathbf{x}\|_2^2 - \frac{3}{4} \|\mathbf{D}\mathbf{a}^*\|_2^2 + \frac{1}{4} \langle \mathbf{D}\mathbf{a}^*, \mathbf{D}\tilde{\mathbf{a}}^* \rangle + \frac{1}{2} \langle \mathbf{x}, (\tilde{\mathbf{D}} - \mathbf{D})\tilde{\mathbf{a}}^* \rangle + \left( \frac{c'_x + 2c_x}{8} \right) \frac{\epsilon}{\lambda},
\end{aligned}$$

where we used Lemma 4 in (17).

Now, taking the (expanded) LHS of (16) and the newly derived upper bound of the RHS of (16) yields the inequality:

$$\begin{aligned}
& \frac{1}{2} \|\mathbf{x}\|_2^2 - \langle \mathbf{x}, \mathbf{D}\mathbf{a}^* \rangle + \frac{1}{2} \|\mathbf{D}\mathbf{a}^*\|_2^2 + \lambda \|\mathbf{a}^*\|_1 \\
& \leq \frac{1}{2} \|\mathbf{x}\|_2^2 - \frac{3}{4} \|\mathbf{D}\mathbf{a}^*\|_2^2 + \frac{1}{4} \langle \mathbf{D}\mathbf{a}^*, \mathbf{D}\tilde{\mathbf{a}}^* \rangle + \frac{1}{2} \langle \mathbf{x}, (\tilde{\mathbf{D}} - \mathbf{D})\tilde{\mathbf{a}}^* \rangle + \left( \frac{c'_x + 2c_x}{8} \right) \frac{\epsilon}{\lambda}.
\end{aligned}$$

Replacing  $\lambda \|\mathbf{a}^*\|_1$  with  $\langle \mathbf{x} - \mathbf{D}\mathbf{a}^*, \mathbf{D}\mathbf{a}^* \rangle$  by Lemma 4 yields:

$$\begin{aligned}
& -\langle \mathbf{x}, \mathbf{D}\mathbf{a}^* \rangle + \frac{1}{2} \|\mathbf{D}\mathbf{a}^*\|_2^2 + \langle \mathbf{x} - \mathbf{D}\mathbf{a}^*, \mathbf{D}\mathbf{a}^* \rangle \\
& \leq -\frac{3}{4} \|\mathbf{D}\mathbf{a}^*\|_2^2 + \frac{1}{4} \langle \mathbf{D}\mathbf{a}^*, \mathbf{D}\tilde{\mathbf{a}}^* \rangle + \frac{1}{2} \langle \mathbf{x}, (\tilde{\mathbf{D}} - \mathbf{D})\tilde{\mathbf{a}}^* \rangle + \left( \frac{c'_x + 2c_x}{8} \right) \frac{\epsilon}{\lambda}.
\end{aligned}$$

Hence,

$$\begin{aligned}
\|\mathbf{D}\mathbf{a}^*\|_2^2 & \leq \langle \mathbf{D}\mathbf{a}^*, \mathbf{D}\tilde{\mathbf{a}}^* \rangle + 2\langle \mathbf{x}, (\tilde{\mathbf{D}} - \mathbf{D})\tilde{\mathbf{a}}^* \rangle + \left( \frac{c'_x + 2c_x}{2} \right) \frac{\epsilon}{\lambda} \\
& \leq \langle \mathbf{D}\mathbf{a}^*, \mathbf{D}\tilde{\mathbf{a}}^* \rangle + 2\frac{\|\mathbf{x}\|_2^3 \epsilon}{2\lambda} + \left( \frac{c'_x + 2c_x}{2} \right) \frac{\epsilon}{\lambda} \\
& = \langle \mathbf{D}\mathbf{a}^*, \mathbf{D}\tilde{\mathbf{a}}^* \rangle + \left( \frac{c'_x + 2c_x + 2\|\mathbf{x}\|_2^3}{2} \right) \frac{\epsilon}{\lambda}
\end{aligned}$$

Then, we obtain

$$\begin{aligned}
& \|\mathbf{D}\mathbf{a}^* - \tilde{\mathbf{D}}\tilde{\mathbf{a}}^*\|_2^2 \\
&= \|\mathbf{D}\mathbf{a}^*\|_2^2 + \|\tilde{\mathbf{D}}\tilde{\mathbf{a}}^*\|_2^2 - 2\langle \mathbf{D}\mathbf{a}^*, \tilde{\mathbf{D}}\tilde{\mathbf{a}}^* \rangle \\
&\leq \|\mathbf{D}\mathbf{a}^*\|_2^2 + \left( \|\mathbf{D}\mathbf{a}^*\|_2^2 + c'_x \frac{\epsilon}{\lambda} \right) + \left( -2\|\mathbf{D}\mathbf{a}^*\|_2^2 + (c'_x + 2c_x + 2\|\mathbf{x}\|_2^3) \frac{\epsilon}{\lambda} \right) \\
&\leq 2(c'_x + c_x + \|\mathbf{x}\|_2^3) \frac{\epsilon}{\lambda}.
\end{aligned}$$

■

**Lemma 9.** [Preservation of Sparsity] If

$$\mathcal{M}_k(\mathbf{D}, \mathbf{x}) > \left(1 + \frac{\|\mathbf{x}\|_2}{\lambda}\right) \|\mathbf{x}\|_2 \|\mathbf{D} - \tilde{\mathbf{D}}\|_{1,2} + \sqrt{2(3\|\mathbf{x}\|_2^2 + 9\|\mathbf{x}\|_2 + 2)\|\mathbf{x}\|_2^2 \frac{\|\mathbf{D} - \tilde{\mathbf{D}}\|_{1,2}}{\lambda}}, \quad (18)$$

then

$$\|\varphi_{\mathbf{D}}(\mathbf{x}) - \varphi_{\tilde{\mathbf{D}}}(\mathbf{x})\|_0 \leq k. \quad (19)$$

**[Proof]** In this proof, we denote  $\varphi_{\mathbf{D}}(\mathbf{x})$  and  $\varphi_{\tilde{\mathbf{D}}}(\mathbf{x})$  by  $\mathbf{a}^* = [a_1^*, \dots, a_m^*]^\top$  and  $\tilde{\mathbf{a}}^* = [\tilde{a}_1^*, \dots, \tilde{a}_m^*]^\top$ , respectively. When  $\tilde{\mathbf{D}} = \mathbf{D}$ , Lemma 9 obviously holds. In the following, we assume  $\tilde{\mathbf{D}} \neq \mathbf{D}$ . Since  $\mathcal{M}_k(\mathbf{D}, \mathbf{x}) > 0$  from (18), there is a  $\mathcal{I} \subset [m]$  with  $|\mathcal{I}| = m - k$  such that for all  $i \in \mathcal{I}$ :

$$0 < \mathcal{M}_k(\mathbf{D}, \mathbf{x}) \leq \lambda - |\langle \mathbf{d}_j, \mathbf{x} - \mathbf{D}\mathbf{a}^* \rangle|. \quad (20)$$

To obtain (19), it is enough to show that  $a_i^* = 0$  and  $\tilde{a}_i^* = 0$  for all  $i \in \mathcal{I}$ .

First, we show  $a_i^* = 0$  for all  $i \in \mathcal{I}$ . From the optimality conditions for the LASSO (?), we have

$$\begin{aligned}
\langle \mathbf{d}_j, \mathbf{x} - \mathbf{D}\mathbf{a}^* \rangle &= \text{sign}(a_j^*)\lambda \quad \text{if } a_j^* \neq 0, \\
|\langle \mathbf{d}_j, \mathbf{x} - \mathbf{D}\mathbf{a}^* \rangle| &\leq \lambda \quad \text{otherwise.}
\end{aligned}$$

Note that the above optimality conditions imply that if  $a_j^* \neq 0$  then

$$|\langle \mathbf{d}_j, \mathbf{x} - \mathbf{D}\mathbf{a}^* \rangle| = \lambda. \quad (21)$$

Combining (21) with (20), it holds that  $a_i^* = 0$  for all  $i \in \mathcal{I}$ .

Next, we show  $\tilde{a}_i^* = 0$  for all  $i \in \mathcal{I}$ . To do so, it is sufficient to show that

$$|\langle \tilde{\mathbf{d}}_i, \mathbf{x} - \tilde{\mathbf{D}}\tilde{\mathbf{a}}^* \rangle| < \lambda \quad (22)$$

for all  $i \in \mathcal{I}$ . Note that

$$\begin{aligned}
|\langle \tilde{\mathbf{d}}_i, \mathbf{x} - \tilde{\mathbf{D}}\tilde{\mathbf{a}}^* \rangle| &= |\langle \mathbf{d}_i + \tilde{\mathbf{d}}_i - \mathbf{d}_i, \mathbf{x} - \tilde{\mathbf{D}}\tilde{\mathbf{a}}^* \rangle| \\
&\leq |\langle \mathbf{d}_i, \mathbf{x} - \tilde{\mathbf{D}}\tilde{\mathbf{a}}^* \rangle| + \|\tilde{\mathbf{d}}_i - \mathbf{d}_i\|_2 \|\mathbf{x} - \tilde{\mathbf{D}}\tilde{\mathbf{a}}^*\|_2 \\
&\leq |\langle \mathbf{d}_i, \mathbf{x} - \tilde{\mathbf{D}}\tilde{\mathbf{a}}^* \rangle| + \|\tilde{\mathbf{D}} - \mathbf{D}\|_{1,2} \|\mathbf{x}\|_2
\end{aligned}$$

and

$$\begin{aligned}
|\langle \mathbf{d}_i, \mathbf{x} - \tilde{\mathbf{D}}\tilde{\mathbf{a}}^* \rangle| &= |\langle \mathbf{d}_i, \mathbf{x} - (\mathbf{D} + \tilde{\mathbf{D}} - \mathbf{D})\tilde{\mathbf{a}}^* \rangle| \\
&\leq |\langle \mathbf{d}_i, \mathbf{x} - \mathbf{D}\tilde{\mathbf{a}}^* \rangle| + |\langle \mathbf{d}_i, (\tilde{\mathbf{D}} - \mathbf{D})\tilde{\mathbf{a}}^* \rangle| \\
&\leq |\langle \mathbf{d}_i, \mathbf{x} - \mathbf{D}\tilde{\mathbf{a}}^* \rangle| + \|\tilde{\mathbf{D}} - \mathbf{D}\|_{1,2} \|\tilde{\mathbf{a}}^*\|_1.
\end{aligned}$$

Hence,

$$|\langle \tilde{\mathbf{d}}_i, \mathbf{x} - \tilde{\mathbf{D}}\tilde{\mathbf{a}}^* \rangle| \leq |\langle \mathbf{d}_i, \mathbf{x} - \mathbf{D}\tilde{\mathbf{a}}^* \rangle| + \left(1 + \frac{\|\mathbf{x}\|_2}{\lambda}\right) \|\mathbf{x}\|_2 \|\mathbf{D} - \tilde{\mathbf{D}}\|_{1,2}.$$

Now,

$$\begin{aligned}
|\langle \mathbf{d}_i, \mathbf{x} - \mathbf{D}\tilde{\mathbf{a}}^* \rangle| &= |\langle \mathbf{d}_i, \mathbf{x} - \mathbf{D}\mathbf{a}^* + \mathbf{D}\mathbf{a}^* - \mathbf{D}\tilde{\mathbf{a}}^* \rangle| \\
&\leq |\langle \mathbf{d}_i, \mathbf{x} - \mathbf{D}\mathbf{a}^* \rangle| + |\langle \mathbf{d}_i, \mathbf{D}\mathbf{a}^* - \mathbf{D}\tilde{\mathbf{a}}^* \rangle| \\
&\leq \lambda - \mathcal{M}_k(\mathbf{D}, \mathbf{x}) + \|\mathbf{D}\mathbf{a}^* - \mathbf{D}\tilde{\mathbf{a}}^*\|_2 \\
&\leq \lambda - \mathcal{M}_k(\mathbf{D}, \mathbf{x}) + \sqrt{2(3\|\mathbf{x}\|_2^2 + 9\|\mathbf{x}\|_2 + 2)\|\mathbf{x}\|_2^2 \frac{\|\mathbf{D} - \tilde{\mathbf{D}}\|_{1,2}}{\lambda}}, \quad (23)
\end{aligned}$$

where (23) is due to Lemma 8. Then, (22) is obtained by (18). ■

Here, we prepare the following lemma.

**Lemma 10.** *When a dictionary  $\mathbf{D}$  is  $\mu$ -incoherent, then the following bound holds for an arbitrary  $k$ -sparse vector  $\mathbf{b}$ :*

$$\mathbf{b}^\top \mathbf{D}^\top \mathbf{D} \mathbf{b} \geq \left(1 - \frac{\mu k}{\sqrt{d}}\right) \|\mathbf{b}\|_2^2.$$

**[Proof]** We set as  $\mathbf{G} := \mathbf{D}^\top \mathbf{D} - \mathbf{I}$ , where  $\mathbf{I}$  is the  $m \times m$  identity matrix. Since  $\mathbf{D}$  is  $\mu$ -incoherent, the absolute value of each component of  $\mathbf{G}$  is less than or equal to  $\mu/\sqrt{d}$ , and thus,  $\mathbf{b}^\top \mathbf{G} \mathbf{b} \geq -\mu/\sqrt{d} \|\mathbf{b}\|_1^2$ . Then, we obtain

$$\mathbf{b}^\top \mathbf{D}^\top \mathbf{D} \mathbf{b} = \mathbf{b}^\top (\mathbf{I} + \mathbf{G}) \mathbf{b} \geq \|\mathbf{b}\|_2^2 - \frac{\mu}{\sqrt{d}} \|\mathbf{b}\|_1^2 \geq \left(1 - \frac{\mu k}{\sqrt{d}}\right) \|\mathbf{b}\|_2^2, \quad (24)$$

where we used the inequality  $\|\mathbf{b}\|_1 \leq \sqrt{k} \|\mathbf{b}\|_2$  for the  $k$ -sparse vector  $\mathbf{b}$  in the last inequality. ■

**Remark 1.** *We mention the relation with the  $k$ -incoherence of a dictionary, which is the assumption of the sparse coding stability in [Mehta and Gray \(2013\)](#). For  $k \in [m]$  and  $\mathbf{D} \in \mathcal{D}$ , the  $k$ -incoherence  $s_k(\mathbf{D})$  is defined as*

$$s_k(\mathbf{D}) := (\min\{\varsigma_k(\mathbf{D}_\Lambda) | \Lambda \subset [m], |\Lambda| = k\})^2,$$

where  $\varsigma_k(\mathbf{D}_\Lambda)$  is the  $k$ -th singular value of  $\mathbf{D}_\Lambda = [\mathbf{d}_{i_1}, \dots, \mathbf{d}_{i_k}]$  for  $\Lambda = \{i_1, \dots, i_k\}$ . From Lemma 10, when a dictionary  $\mathbf{D}$  is  $\mu$ -incoherent, the  $k$ -incoherence of  $\mathbf{D}$  satisfies

$$s_k(\mathbf{D}) \geq 1 - \frac{\mu k}{\sqrt{d}}.$$

Thus, a  $\mu$ -incoherent dictionary has positive  $k$ -incoherence when  $d > (\mu k)^2$ . On the other hand, when  $k \geq 2$ , if a dictionary  $\mathbf{D}$  has positive  $k$ -incoherence  $s_k(\mathbf{D})$ , there is  $\mu > 0$  such that the dictionary is  $\mu$ -incoherent.

**[Proof of Theorem 2]**

Following by the notations of [Mehta and Gray \(2012\)](#), we denote  $\varphi_{\mathbf{D}}(\mathbf{x})$  and  $\varphi_{\tilde{\mathbf{D}}}(\mathbf{x})$  by  $z_*$  and  $t_*$ , respectively. From (23) of [Mehta and Gray \(2012\)](#), we have

$$\begin{aligned} & (z_* - t_*)^\top \mathbf{D}^\top \mathbf{D} (z_* - t_*) \\ & \leq (z_* - t_*)^\top \left( (\tilde{\mathbf{D}}^\top \tilde{\mathbf{D}} - \mathbf{D}^\top \mathbf{D}) t_* + 2(\mathbf{D} - \tilde{\mathbf{D}})^\top \mathbf{x} \right) \\ & = (z_* - t_*)^\top (\tilde{\mathbf{D}}^\top \tilde{\mathbf{D}} - \mathbf{D}^\top \mathbf{D}) t_* + 2(z_* - t_*)^\top (\mathbf{D} - \tilde{\mathbf{D}})^\top \mathbf{x}. \end{aligned} \quad (25)$$

We evaluate the second term in (25)<sup>3</sup>. We have the following by the definition of  $z_*$ :

$$\frac{1}{2} \|\mathbf{x} - \tilde{\mathbf{D}} t_*\|_2^2 + \lambda \|t_*\|_1 \geq \frac{1}{2} \|\mathbf{x} - \tilde{\mathbf{D}} z_*\|_2^2 + \lambda \|z_*\|_1,$$

and thus,

$$2(z_* - t_*)^\top \tilde{\mathbf{D}}^\top \mathbf{x} \geq z_*^\top \tilde{\mathbf{D}}^\top \tilde{\mathbf{D}} z_* - t_*^\top \tilde{\mathbf{D}}^\top \tilde{\mathbf{D}} t_* + 2\lambda(\|z_*\|_1 - \|t_*\|_1).$$

Similarly, we have

$$2(t_* - z_*)^\top \mathbf{D}^\top \mathbf{x} \geq t_*^\top \mathbf{D}^\top \mathbf{D} t_* - z_*^\top \mathbf{D}^\top \mathbf{D} z_* + 2\lambda(\|t_*\|_1 - \|z_*\|_1).$$

Summing up the above inequalities and multiplying  $-1$ , we obtain

$$\begin{aligned} & 2(z_* - t_*)^\top (\mathbf{D} - \tilde{\mathbf{D}})^\top \mathbf{x} \\ & \leq -z_*^\top \tilde{\mathbf{D}}^\top \tilde{\mathbf{D}} z_* + t_*^\top \tilde{\mathbf{D}}^\top \tilde{\mathbf{D}} t_* - t_*^\top \mathbf{D}^\top \mathbf{D} t_* + z_*^\top \mathbf{D}^\top \mathbf{D} z_* \\ & = -z_*^\top (\tilde{\mathbf{D}}^\top \tilde{\mathbf{D}} - \mathbf{D}^\top \mathbf{D}) z_* + t_*^\top (\tilde{\mathbf{D}}^\top \tilde{\mathbf{D}} - \mathbf{D}^\top \mathbf{D}) t_* \\ & = (z_* - t_*)^\top (\mathbf{D}^\top \mathbf{D} - \tilde{\mathbf{D}}^\top \tilde{\mathbf{D}}) z_* - (z_* - t_*)^\top (\tilde{\mathbf{D}}^\top \tilde{\mathbf{D}} - \mathbf{D}^\top \mathbf{D}) t_* \end{aligned} \quad (26)$$

<sup>3</sup>The following bound in [Mehta and Gray \(2012\)](#) is not used in this paper:

$$2(z_* - t_*)^\top (\mathbf{D} - \tilde{\mathbf{D}})^\top \mathbf{x} \leq 2\|\mathbf{D} - \tilde{\mathbf{D}}\|_{1,2} \sqrt{k} \|z_* - t_*\|_2 \|\mathbf{x}\|_2.$$

When  $\mathbf{E} := \mathbf{D} - \tilde{\mathbf{D}}$ , from (25) and (26),

$$\begin{aligned}
& (z_* - t_*)^\top \mathbf{D}^\top \mathbf{D} (z_* - t_*) \\
& \leq (z_* - t_*)^\top (\mathbf{D}^\top \mathbf{D} - \tilde{\mathbf{D}}^\top \tilde{\mathbf{D}}) z_* \\
& \leq |(z_* - t_*)^\top (\mathbf{E}^\top \tilde{\mathbf{D}} + \tilde{\mathbf{D}}^\top \mathbf{E} + \mathbf{E}^\top \mathbf{E}) z_*| \\
& \leq |(z_* - t_*)^\top \mathbf{E}^\top \tilde{\mathbf{D}} z_*| + |(z_* - t_*)^\top \tilde{\mathbf{D}}^\top \mathbf{E} z_*| + |(z_* - t_*)^\top \mathbf{E}^\top \mathbf{E} z_*| \\
& \leq \|\mathbf{E}(z_* - t_*)\|_2 \|\tilde{\mathbf{D}} z_*\|_2 + \|\tilde{\mathbf{D}}(z_* - t_*)\|_2 \|\mathbf{E} z_*\|_2 + \|\mathbf{E}(z_* - t_*)\|_2 \|\mathbf{E} z_*\|_2 \\
& \leq (\|\mathbf{E}\|_{1,2} \|\tilde{\mathbf{D}}\|_{1,2} \|z_*\|_1 + \|\tilde{\mathbf{D}}\|_{1,2} \|\mathbf{E}\|_{1,2} \|z_*\|_1 + \|\mathbf{E}\|_{1,2} \|\mathbf{E}\|_{1,2} \|z_*\|_1) \|z_* - t_*\|_1 \\
& \leq \left( \frac{\|\mathbf{x}\|_2^2 \|\mathbf{E}\|_{1,2}}{\lambda} + \frac{\|\mathbf{x}\|_2^2 \|\mathbf{E}\|_{1,2}}{\lambda} + \frac{\|\mathbf{x}\|_2^2 \|\mathbf{E}\|_{1,2}^2}{\lambda} \right) \sqrt{k} \|z_* - t_*\|_2 \\
& \leq \left( \frac{4\|\mathbf{x}\|_2^2}{\lambda} \right) \|\mathbf{E}\|_{1,2} \sqrt{k} \|z_* - t_*\|_2,
\end{aligned} \tag{27}$$

where we used  $\|\mathbf{E}\|_{1,2} \leq 2$  in the last inequality.

We note that the assumption (18) of Lemma 9 follows from (5). Then, since  $\|z_* - t_*\|_0 \leq k$  from Lemma 9, we have the following lower bound of (25) from the  $\mu$ -incoherence of  $\mathbf{D}$  and Lemma 10:

$$(z_* - t_*)^\top \mathbf{D}^\top \mathbf{D} (z_* - t_*) \geq \left(1 - \frac{\mu k}{\sqrt{d}}\right) \|z_* - t_*\|_2^2. \tag{28}$$

By (27) and (28), we obtain

$$\|z_* - t_*\|_2 \leq \frac{4\|\mathbf{x}\|_2^2 \sqrt{k}}{(1 - \mu k / \sqrt{d}) \lambda} \|\mathbf{D} - \tilde{\mathbf{D}}\|_{1,2}.$$

■

## C Appendix: Proof of Margin Bound

In this proof, we set as

$$\begin{aligned}
\delta_1 &:= \frac{2\sigma}{(1-t)\sqrt{d}\lambda} \exp\left(-\frac{(1-t)^2 d \lambda^2}{8\sigma^2}\right), \\
\delta_2 &:= \frac{2\sigma m}{\sqrt{d}\lambda} \exp\left(-\frac{d \lambda^2}{8\sigma^2}\right), \\
\delta'_3 &:= \frac{4\sigma k}{C\sqrt{d(1-\mu k/\sqrt{d})}} \exp\left(-\frac{C^2 d(1-\mu k/\sqrt{d})}{8\sigma^2}\right) \\
\delta''_3 &:= \frac{8\sigma(d-k)}{d\lambda} \exp\left(-\frac{d^2 \lambda^2}{32\sigma^2}\right), \\
\delta_3 &:= \delta'_3 + \delta''_3.
\end{aligned}$$

Then,  $\delta_{t,\lambda} = \delta_1 + \delta_2 + \delta_3$ .

The column vectors for a  $\mu$ -incoherent dictionary are in general position. Thus, a solution of LASSO for a  $\mu$ -incoherent dictionary is unique due to Lemma 3 in Tibshirani et al. (2013).

The following notions are introduced in Zhao and Yu (2006). Let  $\mathbf{a}$  be a  $k$ -sparse vector. Without loss of generality, we assume that  $\mathbf{a} = [a_1, \dots, a_k, 0, \dots, 0]^\top$ . Then, we denote as  $\mathbf{a}(1) = [a_1, \dots, a_k]^\top$ ,  $\mathbf{D}(1) = [\mathbf{d}_1, \dots, \mathbf{d}_k]$  and  $\mathbf{D}(2) = [\mathbf{d}_{k+1}, \dots, \mathbf{d}_m]$ . Then, we define as  $\mathbf{C}_{ij} := \frac{1}{d} \mathbf{D}(i)^\top \mathbf{D}(j)$  for  $i, j \in \{1, 2\}$ . When a dictionary  $\mathbf{D}$  is  $\mu$ -incoherent and  $(\mu k)^2/d < 1$ ,  $\mathbf{C}_{11}$  is positive definite due to Lemma 10 and especially invertible.

**Definition 6** (Strong Irrepresentation Condition). *There exists a positive vector  $\boldsymbol{\eta}$  such that*

$$|\mathbf{C}_{21} \mathbf{C}_{11}^{-1} \text{sign}(\mathbf{a}(1))| \leq \mathbf{1} - \boldsymbol{\eta},$$

where  $\text{sign}(\mathbf{a}(1))$  maps positive entry of  $\mathbf{a}(1)$  to 1, negative entry to  $-1$  and 0 to 0,  $\mathbf{1}$  is the  $(d-k) \times 1$  vector of 1's and the inequality holds element-wise.



Then, the following lemma is derived by modifying the proof of Corollary 2 of [Zhao and Yu \(2006\)](#).

**Lemma 11** (Strong Irrepresentation Condition). *When a dictionary  $\mathbf{D}$  is  $\mu$ -incoherent and  $d > \{\mu(2k-1)\}^2$  holds, the strong irrepresentation condition holds with  $\eta = (1 - \mu(2k-1)/\sqrt{d})\mathbf{1}$ .*

**Lemma 12.** *Under Assumptions 1-4, when  $\mathbf{D}$  is  $\mu$ -incoherent and  $d > \mu(2k-1)$ , the following holds:*

$$\Pr[|\text{supp}(\mathbf{a} - \varphi_{\mathbf{D}}(\mathbf{x}))| \leq k] \geq 1 - \delta_3.$$

**[Proof]** The following inequality obviously holds:

$$\Pr[|\text{supp}(\mathbf{a} - \varphi_{\mathbf{D}}(\mathbf{x}))| \leq k] \geq \Pr[\text{sign}(\mathbf{a}) = \text{sign}(\varphi_{\mathbf{D}}(\mathbf{x}))].$$

Due to Lemma 11 and Proofs of Theorems 3 and 4 in [Zhao and Yu \(2006\)](#), there exist sub-Gaussian random variables  $\{z_i\}_{i=1}^k$  and  $\{\zeta_i\}_{i=1}^{d-k}$  such that their variances are bounded as  $\mathbf{E}[z_i^2] \leq \sigma^2/d(1 - \mu k/\sqrt{d}) \leq \sigma^2/d(1 - \mu k/\sqrt{d})$  and  $\mathbf{E}[\zeta_i^2] \leq \sigma^2/d^2$  and

$$\begin{aligned} & \Pr[\text{sign}(\mathbf{a}) = \text{sign}(\varphi_{\mathbf{D}}(\mathbf{x}))] \\ & \geq 1 - \sum_{i=1}^k \Pr\left[|z_i| \geq \sqrt{d} \left(|a_i| - \frac{\sqrt{k}\lambda}{2(1 - \mu k/\sqrt{d})d}\right)\right] - \sum_{i=1}^{d-k} \Pr\left[|\zeta_i| \geq \frac{(1 - \mu(2k-1)/d)\lambda}{2\sqrt{d}}\right]. \end{aligned}$$

When  $\lambda \leq (1 - \mu k/\sqrt{d})Cd/\sqrt{k}$ , the inequality  $|a_i| - \frac{\sqrt{k}\lambda}{2(1 - \mu k/\sqrt{d})d} \geq C/2$  holds since  $|a_i| \geq C$ . Then, since  $1 - \mu(2k-1)/d \geq 1/2$  holds, we obtain

$$\begin{aligned} \Pr\left[|z_i| \geq \sqrt{d} \left(|a_i| - \frac{\sqrt{k}\lambda}{2(1 - \mu k/\sqrt{d})d}\right)\right] & \leq \Pr\left[|z_i| \geq \frac{C\sqrt{d}}{2}\right] \leq \delta'_3, \\ \Pr\left[|\zeta_i| \geq \frac{(1 - \mu(2k-1)/d)\lambda}{2\sqrt{d}}\right] & \leq \Pr\left[|\zeta_i| \geq \frac{\lambda}{4\sqrt{d}}\right] \leq \delta''_3, \end{aligned}$$

where we used that  $z_i$  and  $\zeta_i$  are sub-Gaussian. Thus the proof is completed.  $\blacksquare$

**Lemma 13.** *Let  $\mathbf{D}$  be a dictionary. When  $\xi$  satisfies Assumption 4, the following holds:*

$$\Pr[\lambda \geq 2\|\mathbf{D}^\top \xi\|_\infty] \leq 1 - \delta_2,$$

**[Proof]** Let  $\xi$  be a 1-dimensional sub-Gaussian with parameter  $\sigma/\sqrt{d}$ . Then, it holds that for  $t > 0$

$$\Pr[|\xi| > \lambda] \leq \frac{\sigma}{\sqrt{d}\lambda} \exp\left(-\frac{d\lambda^2}{2\sigma^2}\right). \quad (29)$$

Note that  $\langle \mathbf{d}_j, \xi \rangle$  is sub-Gaussian with parameter  $\sigma/\sqrt{d}$  because  $\|\mathbf{d}_j\|_2 = 1$  for every  $j \in [m]$  and components of  $\xi$  are independent and sub-Gaussian with parameter  $\sigma/\sqrt{d}$ . Thus,

$$\Pr[\lambda < 2\|\mathbf{D}^\top \xi\|_\infty] = \Pr\left[\bigcup_{j=1}^m \{\lambda < 2|\langle \mathbf{d}_j, \xi \rangle|\}\right] \leq \sum_{j=1}^m \Pr[\lambda < 2|\langle \mathbf{d}_j, \xi \rangle|] \leq \delta_2,$$

where we used (29) in the last inequality.  $\blacksquare$

**Lemma 14.** *Under Assumptions 1-4, then*

$$\Pr\left[\|\mathbf{a} - \varphi_{\mathbf{D}}(\mathbf{x})\|_2 \leq \frac{3\sqrt{k}}{(1 - \mu k/\sqrt{d})}\lambda\right] \geq 1 - \delta_2 - \delta_3.$$

**[Proof]** By Assumption 1,  $\mathbf{x} = \mathbf{D}\mathbf{a} + \xi$ . We denote  $\varphi_{\mathbf{D}}(\mathbf{x})$  by  $\mathbf{a}^*$  and  $\mathbf{a} - \mathbf{a}^*$  by  $\Delta$ . We have the following inequality by the definition of  $\mathbf{a}^*$ :

$$\frac{1}{2}\|\mathbf{x} - \mathbf{D}\mathbf{a}^*\|_2^2 + \lambda\|\mathbf{a}^*\|_1 \leq \frac{1}{2}\|\mathbf{x} - \mathbf{D}\mathbf{a}\|_2^2 + \lambda\|\mathbf{a}\|_1.$$

Substituting  $\mathbf{x} = \mathbf{D}\mathbf{a} + \boldsymbol{\xi}$ , we have

$$\begin{aligned} \frac{1}{2}\|\mathbf{D}\Delta\|_2^2 &\leq -\langle \mathbf{D}^\top \boldsymbol{\xi}, \Delta \rangle + \lambda(\|\mathbf{a}\|_1 - \|\mathbf{a}^*\|_1) \\ &\leq \|\mathbf{D}^\top \boldsymbol{\xi}\|_\infty \|\Delta\|_1 + \lambda(\|\mathbf{a}\|_1 - \|\mathbf{a}^*\|_1). \end{aligned} \quad (30)$$

Let  $\Delta_k$  be the vector whose  $i$ -th component equals that of  $\Delta$  if  $i$  is in the support of  $\mathbf{a}$  and equals 0 otherwise. In addition, let  $\Delta_k^\perp = \Delta - \Delta_k$ . Using  $\Delta = \Delta_k + \Delta_k^\perp$ , we have

$$\|\mathbf{a}^*\| = \|\mathbf{a} + \Delta_k^\perp + \Delta_k\|_1 \geq \|\mathbf{a}\|_1 + \|\Delta_k^\perp\|_1 - \|\Delta_k\|_1$$

Substituting the above inequality into (30), we have

$$\frac{1}{2}\|\mathbf{D}\Delta\|_2^2 \leq \|\mathbf{D}^\top \boldsymbol{\xi}\|_\infty \|\Delta\|_1 + \lambda(\|\Delta_k\|_1 - \|\Delta_k^\perp\|_1)$$

The inequality  $\lambda \geq 2\|\mathbf{D}^\top \boldsymbol{\xi}\|_\infty$  holds with probability  $1 - \delta_2$  due to Lemma 13, and then, the following inequality holds:

$$0 \leq \frac{1}{2}\|\mathbf{D}\Delta\|_2^2 \leq \frac{1}{2}\lambda(\|\Delta_k\|_1 + \|\Delta_k^\perp\|_1) + \lambda(\|\Delta_k\|_1 - \|\Delta_k^\perp\|_1).$$

Thus,  $\|\Delta_k^\perp\|_1 \leq 3\|\Delta_k\|_1$  and

$$\frac{1}{2}\|\mathbf{D}\Delta\|_2^2 \leq \frac{3}{2}\lambda\|\Delta_k\|_1 - \frac{1}{2}\lambda\|\Delta_k^\perp\|_1 \leq \frac{3}{2}\lambda\|\Delta_k\|_1 \leq \frac{3}{2}\lambda\sqrt{k}\|\Delta_k\|_2.$$

Thus, we have

$$\|\mathbf{D}\Delta\|_2^2 \leq 3\lambda\sqrt{k}\|\Delta_k\|_2 \leq 3\lambda\sqrt{k}\|\Delta\|_2.$$

Here,  $\|\text{supp}(\Delta)\|_0 \leq k$  with probability  $1 - \delta_3$  due to Lemma 12 and the following inequality holds by the  $\mu$ -incoherence of the dictionary  $\mathbf{D}$ :

$$(1 - \mu k/\sqrt{d})\|\Delta\|_2^2 \leq \|\mathbf{D}\Delta\|_2^2,$$

and thus,

$$\|\Delta\|_2 \leq \frac{3\lambda\sqrt{k}}{(1 - \mu k/\sqrt{d})}.$$

■

**[Proof of Theorem 3]** From Assumption 1, an arbitrary sample  $\mathbf{x}$  is represented as  $\mathbf{x} = \mathbf{D}^*\mathbf{a} + \boldsymbol{\xi}$ . Then,

$$\begin{aligned} \langle \mathbf{d}_j, \mathbf{x} - \mathbf{D}^*\varphi_{\mathbf{D}}(\mathbf{x}) \rangle &= \langle \mathbf{d}_j, \boldsymbol{\xi} + \mathbf{D}^*(\mathbf{a} - \varphi_{\mathbf{D}}(\mathbf{x})) \rangle \\ &= \langle \mathbf{d}_j, \boldsymbol{\xi} \rangle + \langle \mathbf{D}^{*\top} \mathbf{d}_j, \mathbf{a} - \varphi_{\mathbf{D}}(\mathbf{x}) \rangle. \end{aligned}$$

Then, we evaluate the probability that the first and second terms is bounded above by  $\frac{1-t}{2}\lambda$ .

We evaluate the probability for the first term. Since  $\|\mathbf{d}_j\| = 1$  by the definition and  $\boldsymbol{\xi}$  is drawn from a sub-Gaussian distribution with parameter  $\sigma^2/\sqrt{d}$ , we have

$$\Pr \left[ \langle \mathbf{d}_j, \boldsymbol{\xi} \rangle \leq \frac{1-t}{2}\lambda \right] \geq 1 - \delta_1.$$

With probability  $1 - \delta_2 - \delta_3$ , the second term is evaluated as follows:

$$\begin{aligned} \langle \mathbf{D}^{*\top} \mathbf{d}_j, \mathbf{a} - \varphi_{\mathbf{D}}(\mathbf{x}) \rangle &= \langle [\langle \mathbf{d}_1, \mathbf{d}_j \rangle, \dots, \langle \mathbf{d}_m, \mathbf{d}_j \rangle]^\top, \mathbf{a} - \varphi_{\mathbf{D}}(\mathbf{x}) \rangle \\ &= \langle (\mathbf{1}_{\text{supp}(\mathbf{a} - \varphi_{\mathbf{D}}(\mathbf{x}))} \circ [\langle \mathbf{d}_1, \mathbf{d}_j \rangle, \dots, \langle \mathbf{d}_m, \mathbf{d}_j \rangle])^\top, \mathbf{a} - \varphi_{\mathbf{D}}(\mathbf{x}) \rangle \\ &\leq \|(\mathbf{1}_{\text{supp}(\mathbf{a} - \varphi_{\mathbf{D}}(\mathbf{x}))} \circ [\langle \mathbf{d}_1, \mathbf{d}_j \rangle, \dots, \langle \mathbf{d}_m, \mathbf{d}_j \rangle])^\top\|_2 \|\mathbf{a} - \varphi_{\mathbf{D}}(\mathbf{x})\|_2 \\ &\leq \frac{\mu}{\sqrt{d}} \sqrt{|\text{supp}(\mathbf{a} - \varphi_{\mathbf{D}}(\mathbf{x}))|} \|\mathbf{a} - \varphi_{\mathbf{D}}(\mathbf{x})\|_2 \\ &\leq \frac{3\mu k}{(1 - \mu k/\sqrt{d})\sqrt{d}} \lambda \end{aligned} \quad (31)$$

$$\leq \frac{1-t}{2}\lambda, \quad (32)$$

where we used Lemmas 12 and 14 in (31) and  $d \geq \left\{ \left( 1 + \frac{6}{(1-t)} \right) \mu k \right\}^2$  in (32). Thus, with probability  $1 - (\delta_1 + \delta_2 + \delta_3) = 1 - \delta_{t,\lambda}$ ,

$$\mathcal{M}_{k,\mathbf{D}^*}(\mathbf{x}) \geq \lambda - \langle \mathbf{d}_j, \mathbf{x} - \mathbf{D}^* \varphi_{\mathbf{D}}(\mathbf{x}) \rangle \geq t\lambda.$$

Thus, the proof of Theorem 3 is completed. ■

## References

- [1] M. S. Asif and J. Romberg (2010) “On the lasso and dantzig selector equivalence,” in *Information Sciences and Systems (CISS), 2010 44th Annual Conference on*, pp. 1–6, IEEE.
- [2] N. A. Mehta and A. G. Gray (2012) “On the sample complexity of predictive sparse coding,” *arXiv preprint arXiv:1202.4050*.
- [3] N. Mehta and A. G. Gray (2013) “Sparsity-based generalization bounds for predictive sparse coding,” in *Proceedings of the 30th International Conference on Machine Learning (ICML-13)*, pp. 36–44.
- [4] R. J. Tibshirani et al. (2013) “The lasso problem and uniqueness,” *Electronic Journal of Statistics*, Vol. 7, pp. 1456–1490.
- [5] P. Zhao and B. Yu (2006) “On model selection consistency of Lasso,” *The Journal of Machine Learning Research*, Vol. 7, pp. 2541–2563.
